# Supplementary material for: Physicochemical properties of polysaccharides from Ligusticum chuanxiong and analysis of their anti-tumor potential through immunoregulation
Source: Royal Society of Chemistry journal article supplement (doi:10.1039/d0fo02978e), 2021-01-01
Supplement: d0fo02978e1.pdf [file d0fo02978e1.pdf]

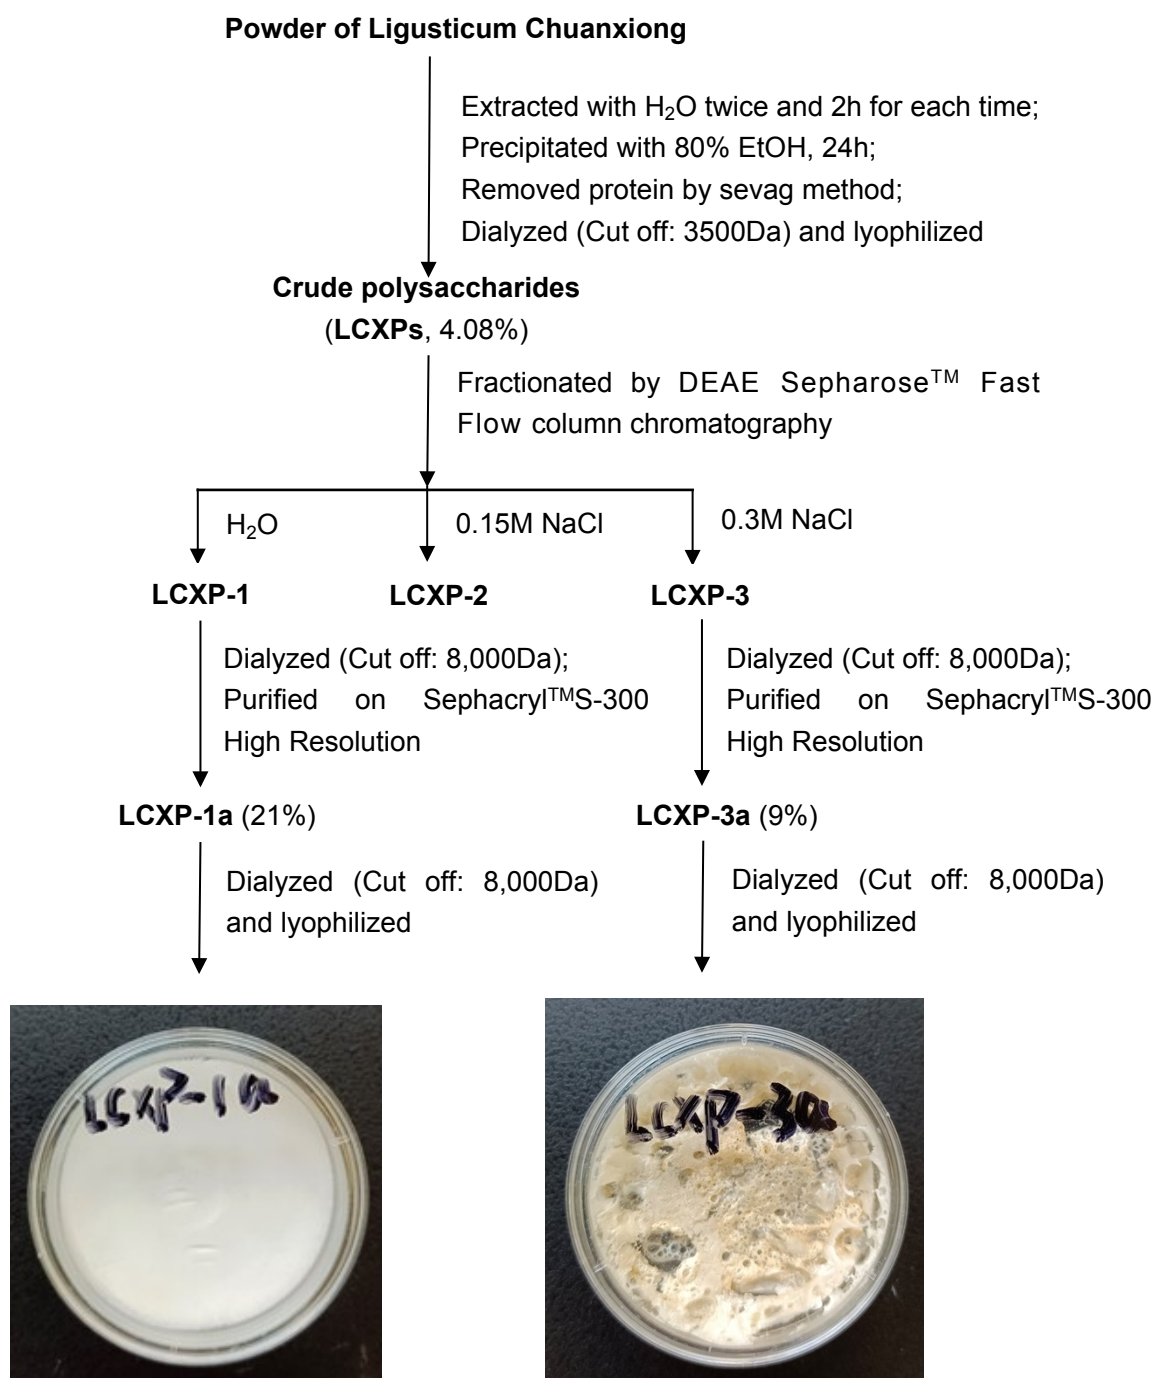

**Fig. S1.** The Flowchart for the isolation of purified polysaccharides from Ligusticum chuanxiong.

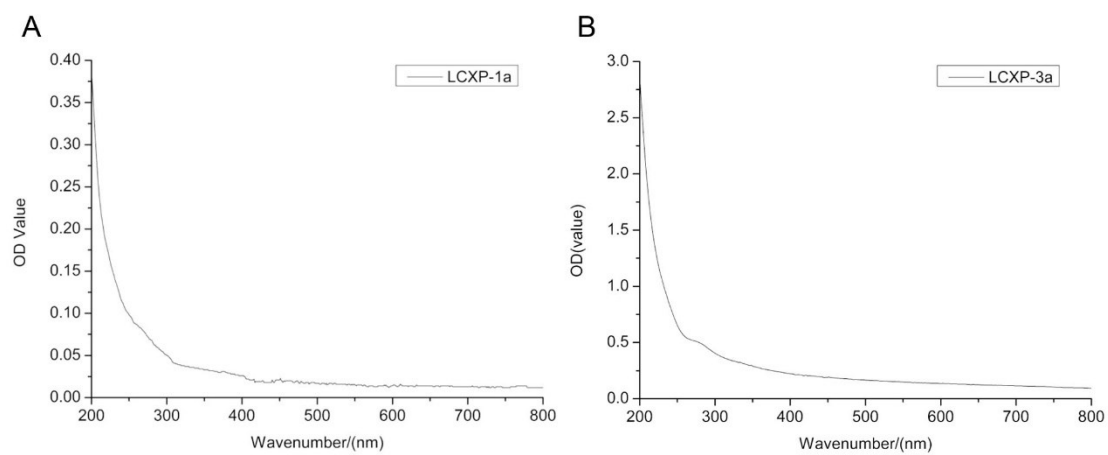

**Fig. S2.** The UV spectra of LCXP-1a (A) and LCXP-3a (B).
